# Supplementary material for: Challenging the roles of CD44 and lipolysis stimulated lipoprotein receptor in conveying Clostridium perfringens iota toxin cytotoxicity in breast cancer
Source: PubMed Central journal article supplement (PMC4086999; doi:10.1186/1476-4598-13-163), 2014-07-02
Supplement: 1476-4598-13-163-S3.pdf [file 1476-4598-13-163-S3.pdf]

**Table S1** Iota Toxin Sensitivity of Cells Following Tunicamycin Treatment

| Cell Line | Ia (10ng/ml) | Ia (10ng/ml)<br>+Ib (20ng/ml) | Ia (10ng/ml)<br>+Ib (20ng/ml)<br>+Tunicamycin | Ia (50ng/ml)<br>+Ib (100ng/ml) | Ia (100ng/ml)<br>+Ib (200ng/ml)<br>+Tunicamycin |
|-----------|--------------|-------------------------------|-----------------------------------------------|--------------------------------|-------------------------------------------------|
| MCF-7     | -            | +                             | +                                             | ++                             | ++                                              |
| Hs578t    | -            | -                             | -                                             | -                              | -                                               |

(-) Resistant, 0 to 10% cell rounding; (+) Sensitive, 11 to 50% cell rounding; (++) Highly Sensitive, >50% cell rounding. Toxin Sensitivity at 8 h post treatment

**Table S2** Primers used to detect splice variants

| Gene                      | Forward Sequence<br>(5'-3') | Reverse Sequence<br>(5'-3') |
|---------------------------|-----------------------------|-----------------------------|
| <b>CD44<br/>Variant 1</b> | GACACATATTGCTT<br>CAATGC    | CATCCCTCTTGGC<br>CTTGGC     |
| <b>CD44<br/>Variant 2</b> | GAATCCCTGCTACC<br>AGTAC     | GAAAGAGACAGA<br>CACCTCAG    |
| <b>CD44<br/>Variant 3</b> | GAATCCCTGCTACC<br>AATAT     | GACAGGACCTCTT<br>TCAATG     |
| <b>CD44<br/>Variant 4</b> | GAATCCCTGCTACC<br>AGAGAC    | GTGGGCAGAAGAA<br>AAAGCTAG   |
| <b>CD44<br/>Variant 5</b> | GATTTGAGACCTGC<br>AGTTGC    | GTGGGCAGAAGAA<br>AAAGCTAG   |
| <b>CD44<br/>Variant 6</b> | GAATCCCTGCTACC<br>AATAG     | GTTATACCTCTCAT<br>TACC      |
| <b>CD44<br/>Variant 7</b> | GAATCCCTGCTACC<br>AGACA     | CATCCCTCTTGGC<br>CTTGGC     |
| <b>CD44<br/>Variant 8</b> | GAATCCCTGCTACC<br>AGAGAC    | CAACCTCTGGTCC<br>TATAAG     |
| <b>LSR<br/>Variant 1</b>  | ATCGTCCTTGACTG<br>GCTCTTC   | TGTAGCCACTGCG<br>GACTTC     |
| <b>LSR<br/>Variant 2</b>  | GTCCTTGGGAGGA<br>CCTCAG     | GAGCCAGTCTTCT<br>ATGGGC     |
| <b>LSR<br/>Variant 3</b>  | CAGAGCTCATCGTC<br>CTTGTGT   | GGGGGCATAAATG<br>CTGGGAA    |
| <b>LSR<br/>Variant 4</b>  | GACTGGCTCTTCGT<br>GGTTGT    | ACGTAGCAGCAGC<br>AAGTGTG    |
| <b>LSR<br/>Variant 5</b>  | ACCATCACCGGAA<br>TGTATGC    | TCCCGAAGCAGGG<br>GTACATA    |
| <b>ILDR1</b>              | AGCTCCCAGGTTTC<br>ATCTTATC  | GATTGGTGGTCTG<br>GGTCATT    |
| <b>ILDR2</b>              | GATGATGTGGAGG<br>GCAAGAA    | CAAAGACCCACTC<br>TGGCATAA   |
